# Supplementary material for: An electrochemiluminescence based assay for quantitative detection of endogenous and exogenously applied MeCP2 protein variants
Source: PubMed Central journal article supplement (PMC6538716; doi:10.1038/s41598-019-44372-3), 2019-05-28
Supplement: 41598_2019_44372_MOESM1_ESM.pdf [file 41598_2019_44372_MOESM1_ESM.pdf]

**Supporting Information (Fig. S1–S4) of Steinkellner et al. “An electrochemiluminescence based assay for quantitative detection of endogenous and exogenously applied MeCP2 protein variants”**

Hannes Steinkellner<sup>1\*</sup>, Anna Schöneegger<sup>1</sup>, Julia Etzler<sup>1</sup>, Prakasha Kempaiah<sup>3</sup>, Anna Huber<sup>1</sup>, Kathrin Hahn<sup>2</sup>, Katrin Rose<sup>1</sup>, Mark Duerr<sup>4</sup>, John Christodoulou<sup>5</sup>, Alexander V. Beribisky<sup>1</sup>, Winfried Neuhaus<sup>2</sup>, Franco Laccone<sup>1</sup>

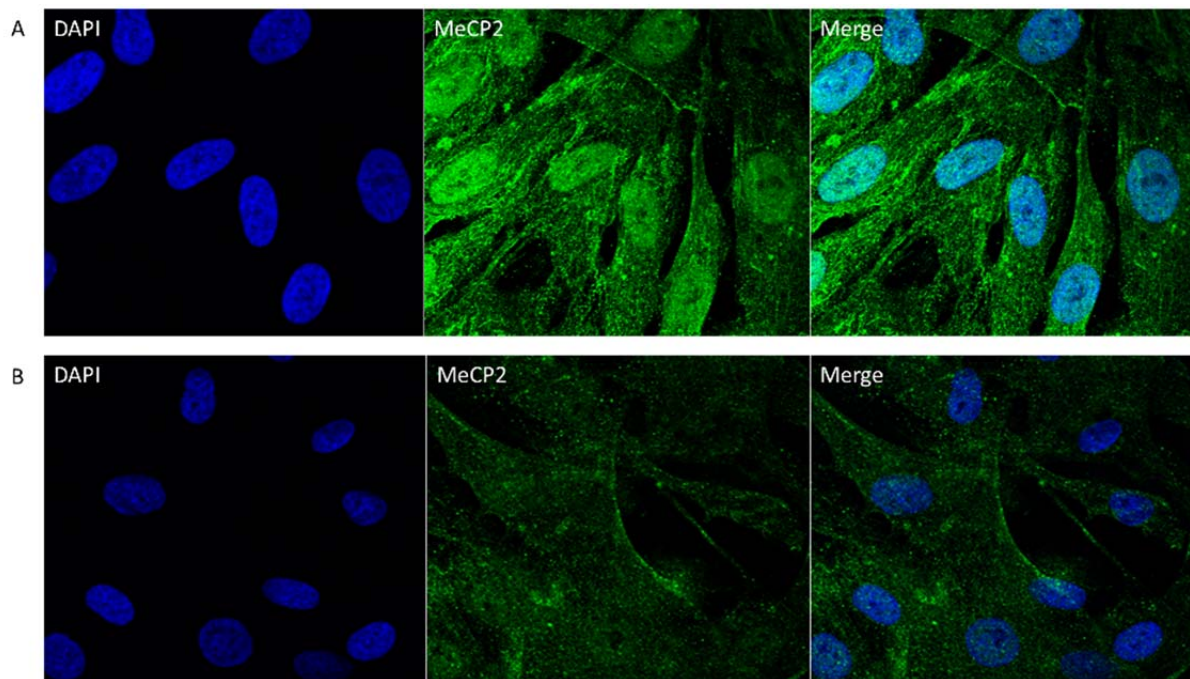

**Fig. S1 A/B.** Immunofluorescent images of cultured fibroblasts to compare MeCP2 levels in healthy control fibroblasts (**A**) and a RTT patient fibroblast (c.806delG) cell line (**B**). Immunofluorescence was performed using the anti-MeCP2 rabbit polyclonal antibody that was used as capture antibody in our MeCP2-ECLIA (Eurogentec, Seraing, Belgium). Nuclei were counterstained with DAPI.

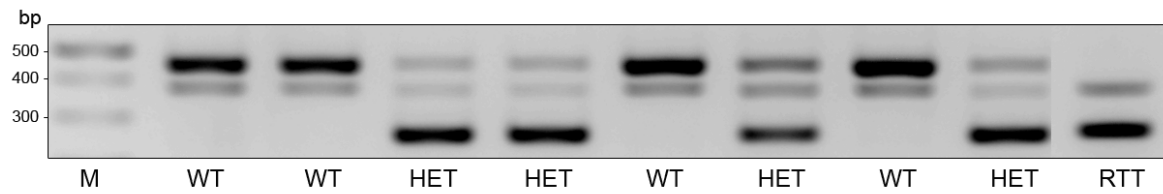

**Fig. S2.** Agarose gel of genotyping samples from female wild type and heterozygous mice and one male knock out mouse. M (Marker), WT (female wild type mouse, *Mecp2*<sup>+/+</sup>), HET (female heterozygous mouse, *Mecp2*<sup>+/-</sup>) and RTT (*Mecp2* null male, *Mecp2*<sup>-/y</sup>). Expected results as specified by the supplier: Mutant = 240 bp; Heterozygote = 240 bp and 465 bp; Wild type = 465 bp

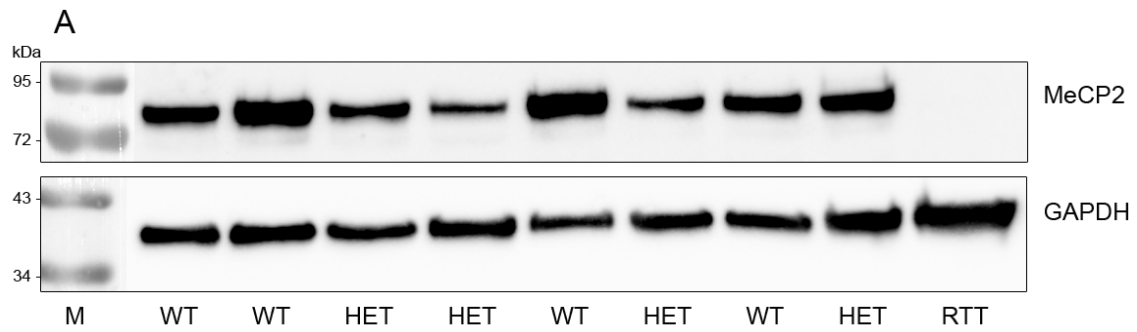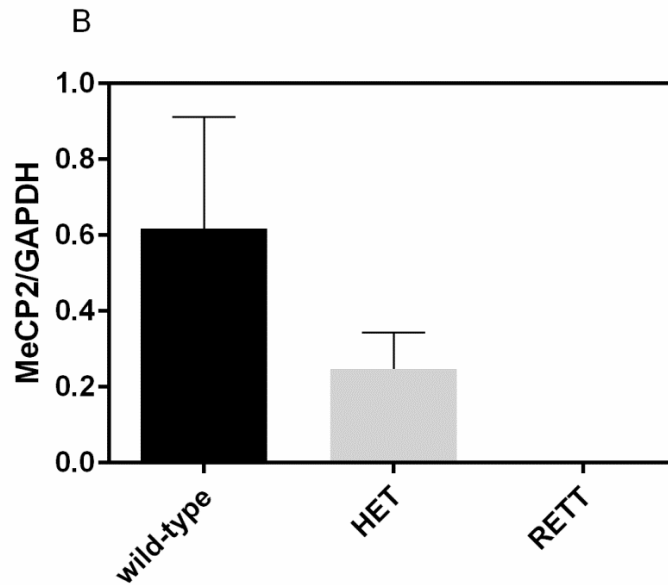

**Fig. S3 A/B.** Western blot analysis of wild-type (WT), heterozygous (HET) and MeCP2-Knock out (RTT) mice. **(A)** Immunoblotting was performed using the anti-MeCP2 rabbit polyclonal antibody that was used as capture antibody in our MeCP2-ECLIA (Eurogentec, Seraing, Belgium). **(B)** Quantification of MeCP2 western blot normalized to GAPDH. No significant difference between female wild-type and heterozygous mice was detected.

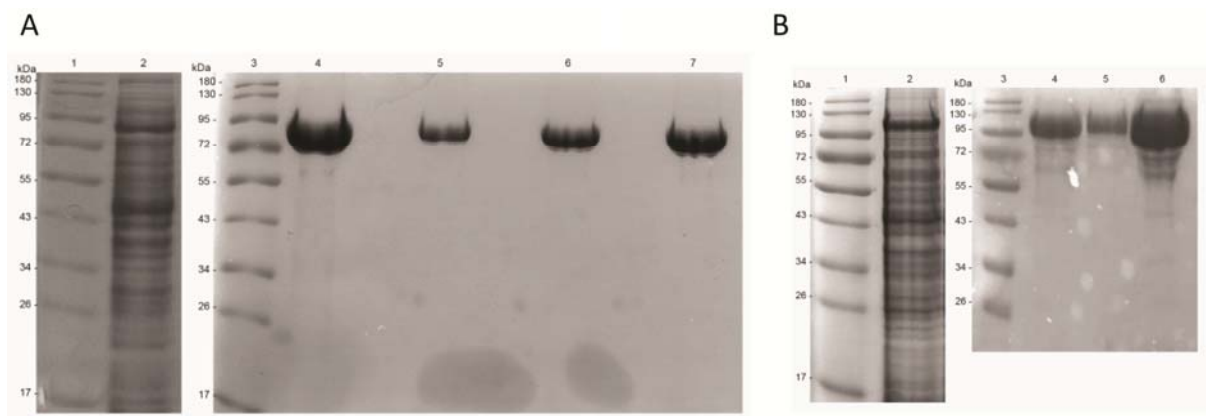

**Fig. S4** Uncropped SDS-PAGE gels. TAT-MECP2 (**A**) and TAT-MECP2-eGFP (**B**)
